# Supplementary material
Source: publisher figshare collection journal article supplement (https://acs.figshare.com/ndownloader/files/23757619)
Supplement: Supplementary file 1 [file 23757619]

**Supporting Information**

**Efficient removal of thallium from flue gas using manganese-based MOF  
catalysts by gas–solid phase catalytic oxidation and adsorption**

Qiang Ma <sup>a, c</sup>, Lijuan Jia <sup>b, \*</sup>, Xueqian Wang <sup>a, \*</sup>, Ping Ning <sup>a</sup>, Langlang Wang <sup>a</sup>, Lixia  
Xu <sup>a</sup>, Shu Sun <sup>c</sup>, Yixing Ma <sup>a</sup>, Yingjie Zhang <sup>a</sup>, Tao Lei <sup>a</sup>, Wei Liu <sup>a</sup>, Jiming Hao <sup>d</sup>

<sup>a</sup> Faculty of Environmental Science and Engineering, Kunming University of  
Science and Technology, Kunming 650500, Yunnan, China

<sup>b</sup> School of Chemistry and Environment, Yunnan Minzu University, Kunming  
650500, Yunnan, China

<sup>c</sup> Sichuan Academy of Environmental Science, Chengdu 610041, Sichuan, China

<sup>d</sup> State Key Joint Laboratory of Environment Simulation and Pollution Control,  
School of Environment, Tsinghua University, Beijing 100084, China

**Table S1** Comparison of the Tl(I) removed amount on Mn-loaded MOF with reported  
studies.

1 **Table S2** Comparison of the Tl(I) removed amount on Mn-loaded MOF with reported studies.

| environmental medium | mechanism                | catalyst/sorbent                                | particle size ( $\mu\text{m}$ ) | removal rate (%) | reaction time (min) | temperature (K)   | removed amount (mg/g) | regeneration cycles | reference in manuscript |
|----------------------|--------------------------|-------------------------------------------------|---------------------------------|------------------|---------------------|-------------------|-----------------------|---------------------|-------------------------|
| waste water          | adsorption and oxidation | manganese dioxide coated magnetic pyrite cinder | 0.39                            | 99               | 700                 | 298               | 320                   | 5                   | 10                      |
| aqueous solutions    | adsorption and oxidation | amorphous hydrous manganese dioxide             | -                               | 88               | 120                 | 288, 303, and 318 | 79.05                 | 5                   | 11                      |
| water                | adsorption               | titanium peroxide                               | 110                             | 95               | 720                 | 298               | 412                   | 5                   | 8                       |
| Water                | adsorption               | mesoporous silica                               | -                               | 95               | 1000                | 298               | 28.3                  | -                   | 13                      |
| aqueous solution     | adsorption               | treated sawdust                                 | 600                             | 98               | 8                   | 293-313           | 13.2                  | 1                   | 14                      |
| aqueous solution     | adsorption               | sugar beet pulp                                 | 250                             | 96               | 15                  | 298               | 185.2                 | -                   | 15                      |
| aquatic environment  | adsorption               | multiwalled carbon nanotubes                    | -                               | 95               | 400                 | 298               | 0.43                  | -                   | 16                      |
| aqueous solutions    | adsorption               | titanate nanotubes                              |                                 | 100              | 180                 | 298               | 709.2                 | 2                   | 17                      |
| aqueous solutions    | biochemistry             | aspergillus niger biomass                       | -                               | 70               | 700                 | 295               | 10                    | -                   | 18                      |

|                      |                             |                                |       |    |      |     |       |   |            |
|----------------------|-----------------------------|--------------------------------|-------|----|------|-----|-------|---|------------|
| water                | adsorption and<br>oxidation | nanosized<br>manganese dioxide | -     | 83 | 1440 | 298 | 672   | - | 12         |
| smelting flue<br>gas | adsorption and<br>oxidation | manganese loaded<br>MOF        | 0.083 | 90 | 600  | 423 | 89.54 | 5 | this study |

---

1  
2
